# Supplementary material for: Synthesis of MoP decorated carbon cloth as a binder-free electrode for hydrogen evolution
Source: Royal Society of Chemistry journal article supplement (doi:10.1039/c6ra12456a), 2016-01-01
Supplement: c6ra12456a3.pdf [file c6ra12456a3.pdf]

## Supporting Information

### Synthesis of MoP decorated carbon cloth as a binder-free electrode for hydrogen evolution

*Chen Deng, & Jiangzhou Xie, & Yifei Xue, Meng He, Xiaotong Wei and Yi-Ming Yan\**

School of Chemical Engineering and Environment, Beijing Institute of Technology,  
Beijing, 100081, People's Republic of China

\*Corresponding Author.

&These authors have the same contribution to this work.

Email: [bityanyiming@163.com](mailto:bityanyiming@163.com)

Tel (Fax): +86-10-68918891

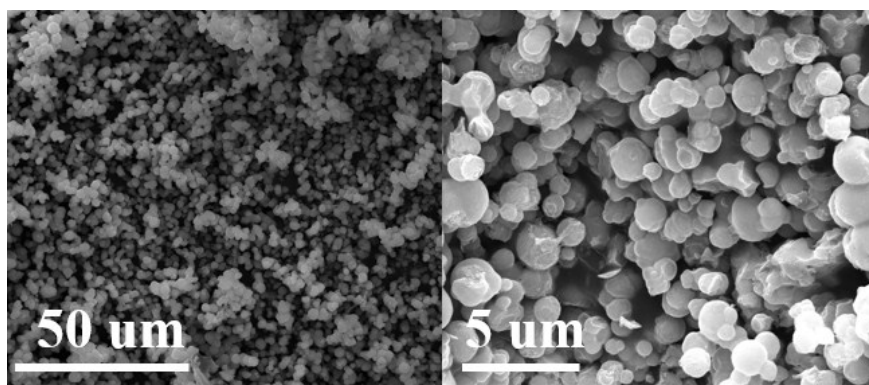

Fig. S1 (a) (b) SEM images of molybdenum phosphide microspheres (MoP-MS) at different magnification.

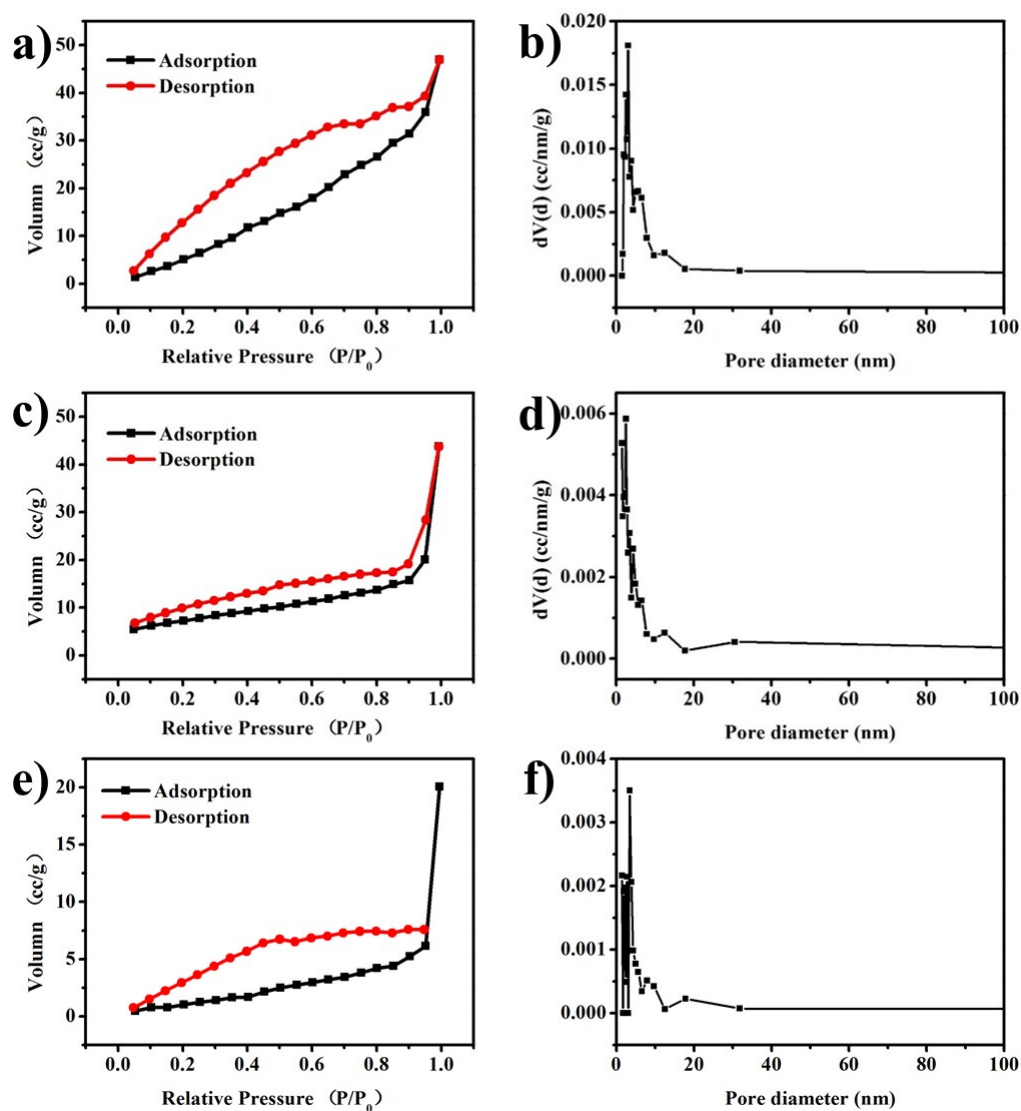

Fig. S2 Nitrogen adsorption/desorption isotherm plots and the BJH pore-size distribution curves of (a) (b) MoP-HS@CC, (c) (d) MoP-MS and (e) (f) CC.

Table S1 The details of the BET results of MoP-HS@CC, MoP-MS and CC

|           | Surface areas /m <sup>2</sup> | Pore Volume / cc/g | Average pore sizes /nm |
|-----------|-------------------------------|--------------------|------------------------|
| MoP-HS@CC | 48.98                         | 0.0726             | 5.93                   |
| MoP-MS    | 25.81                         | 0.0677             | 10.50                  |
| CC        | 5.09                          | 0.0310             | 24.36                  |

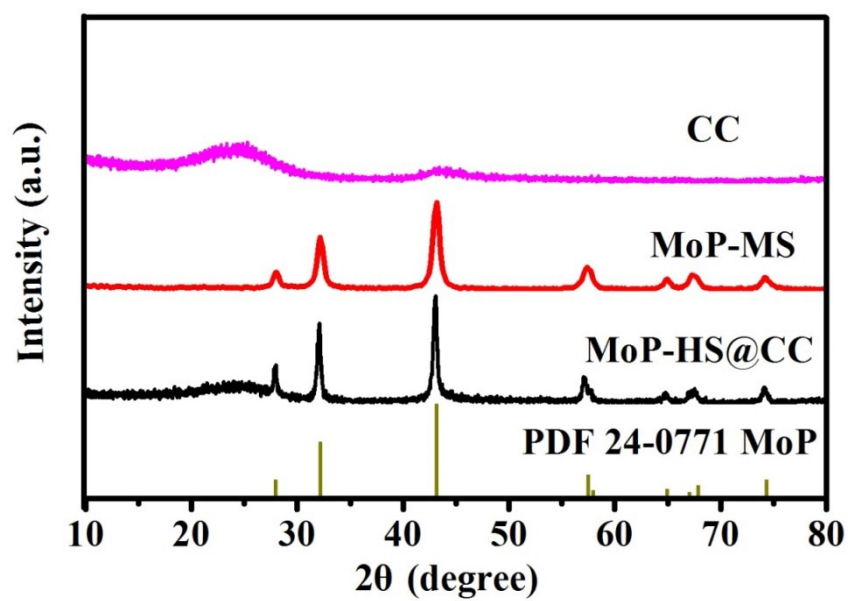

Fig. S3 XRD patterns of 3D MoP-HS@CC, MoP-MS and CC.

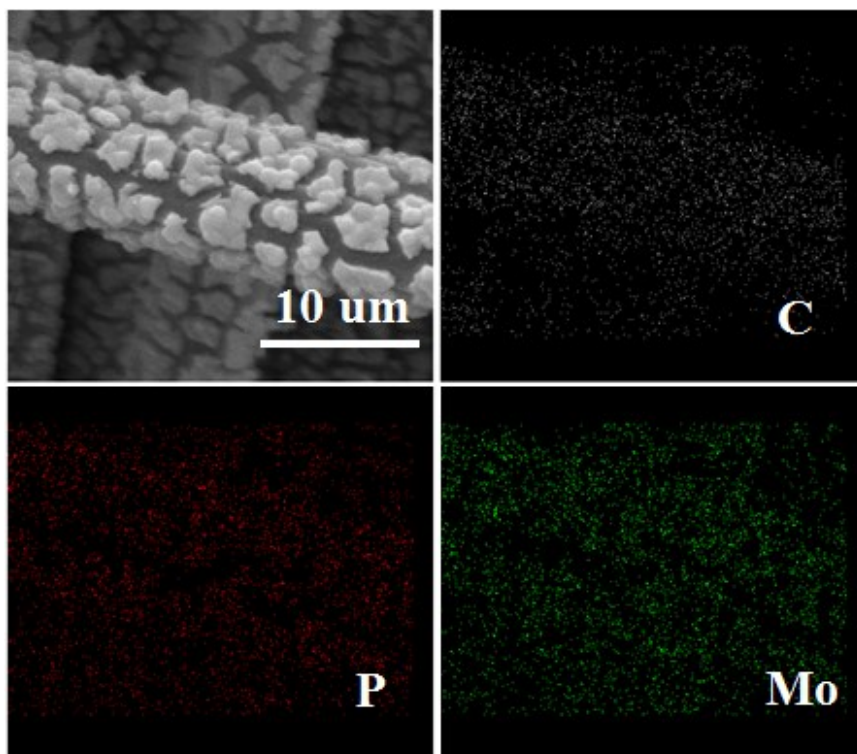

Fig. S4 EDS elemental mappings of Mo, P and C at the surface of MoP-HS@CC.

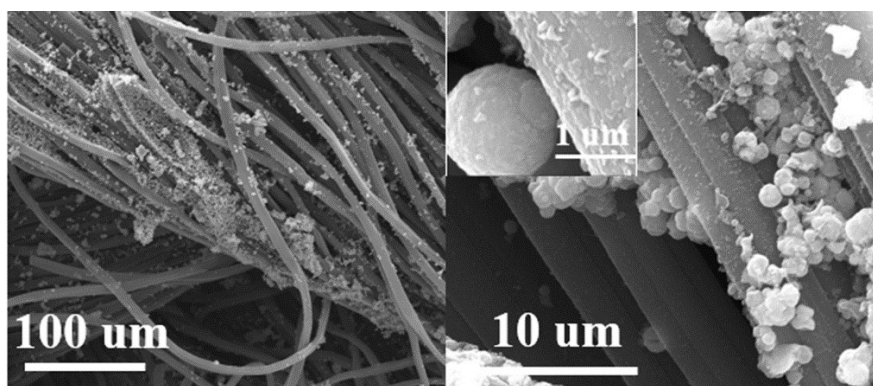

Fig. S5 (a) (b) SEM images of MoP-MS/CC at different magnification.

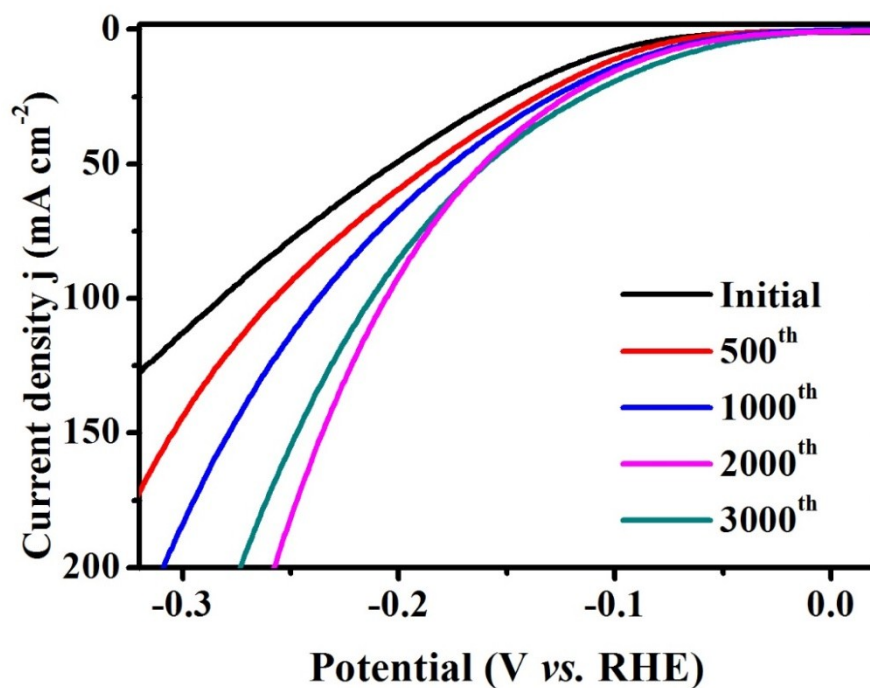

Fig. S6 Polarization curves of MoP-HS@CC that electrochemically activated at different cycles in 0.5 M H<sub>2</sub>SO<sub>4</sub> at a scan rate of 100 mV s<sup>-1</sup>.

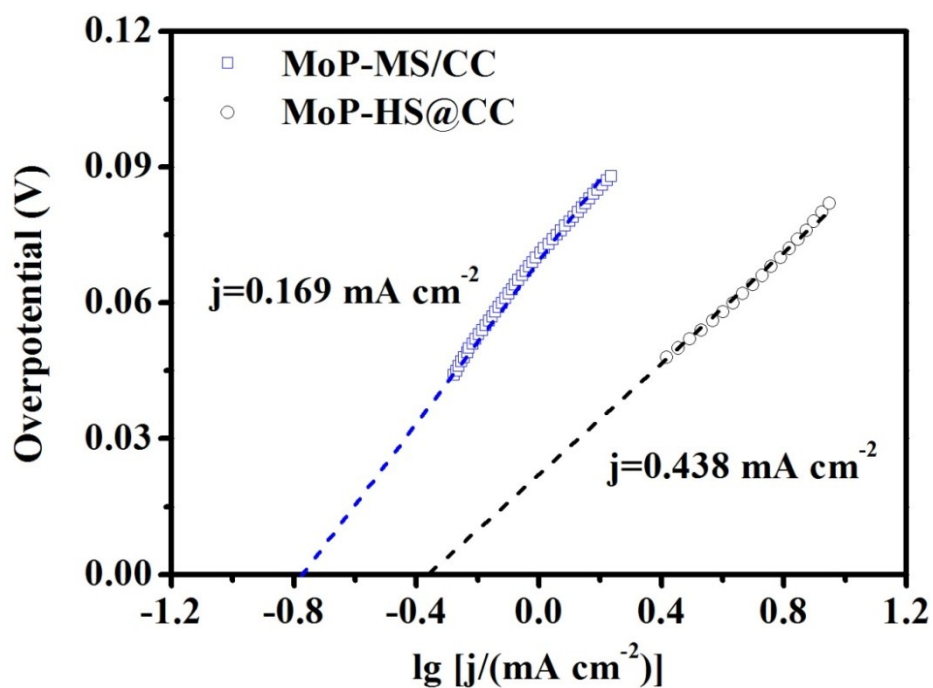

Fig. S7 Exchange current densities for different catalysts extracted from Tafel plots.

Table S2 Comparison of HER performance of MoP-HS@CC with other reported Mo-based or TMPs HER electrocatalysts in acidic media.

| Catalyst                             | Tafel slope<br>(mV/dec) | Current<br>density<br>j (mA cm <sup>-2</sup> ) | $\eta$ at the<br>corresponding j<br>(mV) | Exchange<br>current density<br>(mA cm <sup>-2</sup> ) | Reference |
|--------------------------------------|-------------------------|------------------------------------------------|------------------------------------------|-------------------------------------------------------|-----------|
| metallic MoS <sub>2</sub> nanosheets | 54                      | 10                                             | 195                                      | -                                                     | [1]       |
| MoS <sub>2</sub> /graphene/Ni foam   | 42.8                    | 10                                             | 141                                      | -                                                     | [2]       |
| MoP                                  | 54                      | 30                                             | 180                                      | 3.4×10 <sup>-2</sup>                                  | [3]       |
| MoP                                  | 60                      | 10                                             | 246                                      | 4.15×10 <sup>-3</sup>                                 | [4]       |
| MoP network                          | 54                      | 10                                             | 125                                      | 8.6×10 <sup>-2</sup>                                  | [5]       |
| amorphous MoP NPs                    | 45                      | 10                                             | 90                                       | 1.2×10 <sup>-1</sup>                                  | [6]       |
| WP/CC                                | 69                      | 10                                             | 130                                      | 0.29                                                  | [7]       |
| WP <sub>2</sub> SMP                  | 57                      | 10                                             | 161                                      | 0.017                                                 | [8]       |
| CoP/CNT                              | 54                      | 10                                             | 122                                      | 0.13                                                  | [9]       |
| CoP nanotubes                        | 60                      | 10                                             | 144                                      | -                                                     | [10]      |
| CoP/CC                               | 51                      | 10                                             | 67                                       | 0.288                                                 | [11]      |
| CoP/Ti                               | 43                      | 10                                             | 90                                       | -                                                     | [12]      |
| FeP NAs/Ti                           | 60                      | 10                                             | 85                                       | -                                                     | [13]      |
| NiP <sub>2</sub> NS/CC               | 51                      | 10                                             | 75                                       | 0.26                                                  | [14]      |
| MoSe <sub>2</sub>                    | 69                      | 10                                             | 182                                      | 0.021                                                 | [15]      |
| MoP-graphite                         | 63                      | 30                                             | 300                                      | 6.367×10 <sup>-2</sup>                                | [16]      |
| MoP nanosheets /CF                   | 56.4                    | 10.1                                           | 200                                      | -                                                     | [17]      |
| MoP-HS@CC                            | 61                      | 10                                             | 87                                       |                                                       |           |
|                                      |                         | 20                                             | 112                                      | 0.438                                                 | This work |
|                                      |                         | 100                                            | 195                                      |                                                       |           |
| MoP-MS/CC                            | 92                      | 10                                             | 147                                      | 0.169                                                 | This work |

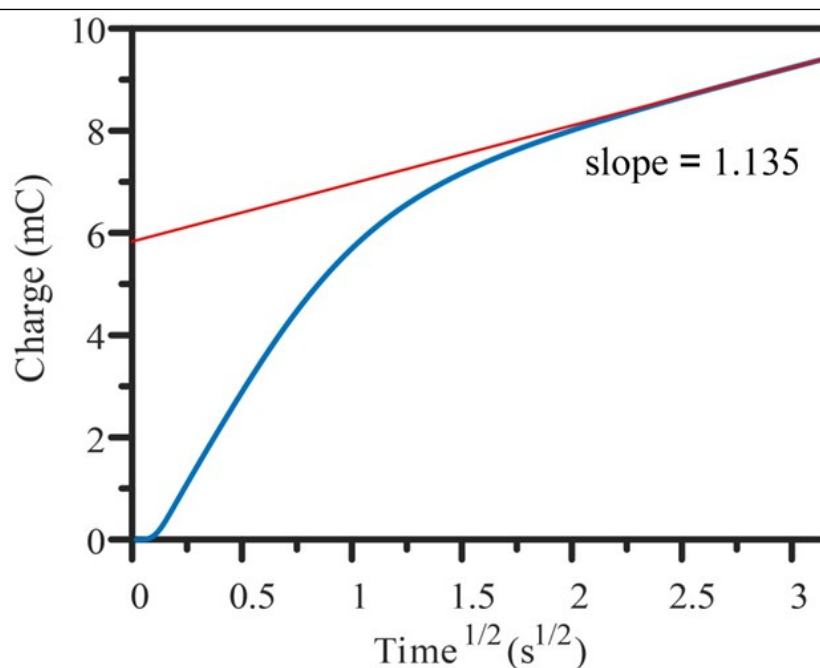

Fig. S8 The chronocoulometry plots for the electrodes in mixed solution of 0.1 mM K<sub>3</sub>[Fe(CN)<sub>6</sub>] and 0.1 M KCl at room temperature.

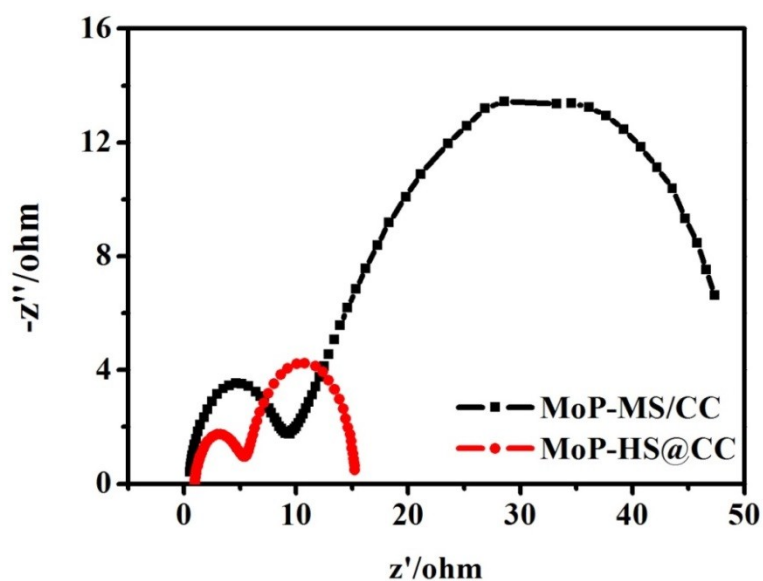

Fig. S9 The Nyquist plots of MoP-HS@CC and MoP-MS/CC recorded in 0.5 M H<sub>2</sub>SO<sub>4</sub> solution at the potential of 100 mV.

Table S3 Comparison of HER performance of 3D MoP-HS@CC with other reported non-noble metal HER electrocatalysts in basic media.

| Catalyst                        | Tafel slope<br>(mV/dec) | Current<br>density<br>$j$ (mA cm <sup>-2</sup> ) | $\eta$ at the<br>corresponding $j$<br>(mV) | Reference |
|---------------------------------|-------------------------|--------------------------------------------------|--------------------------------------------|-----------|
| Co-NRCNTs                       | -                       | 10                                               | 370                                        | [18]      |
| MoP                             | 48                      | 10                                               | 130                                        | [3]       |
| bulk MoB                        | 59                      | 10                                               | 225                                        | [19]      |
| WP/CC                           | 102                     | 10                                               | 150                                        | [7]       |
| WP <sub>2</sub> SMP             | 60                      | 10                                               | 153                                        | [8]       |
| Ni <sub>2</sub> P nanoparticles | 100                     | 20                                               | 250                                        | [20]      |
| CoP/CC                          | 129                     | 10                                               | 209                                        | [11]      |
| 11FeP NAs/CC                    | 146                     | 10                                               | 218                                        | [21]      |
| NiP <sub>2</sub> NS/CC          | 64                      | 10                                               | 102                                        | [14]      |
| MoP-HS@CC                       | 64                      | 10                                               | 121                                        | This work |
|                                 |                         | 100                                              | 223                                        |           |

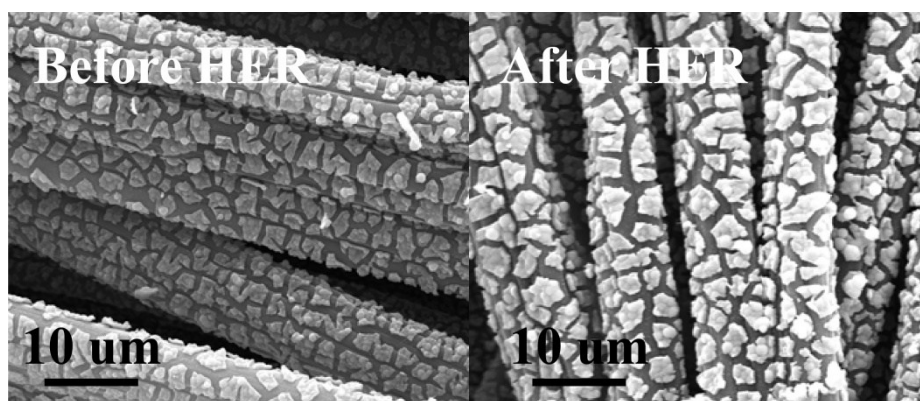

Fig. S10 SEM images of MoP-HS@CC before and after long-term stability test

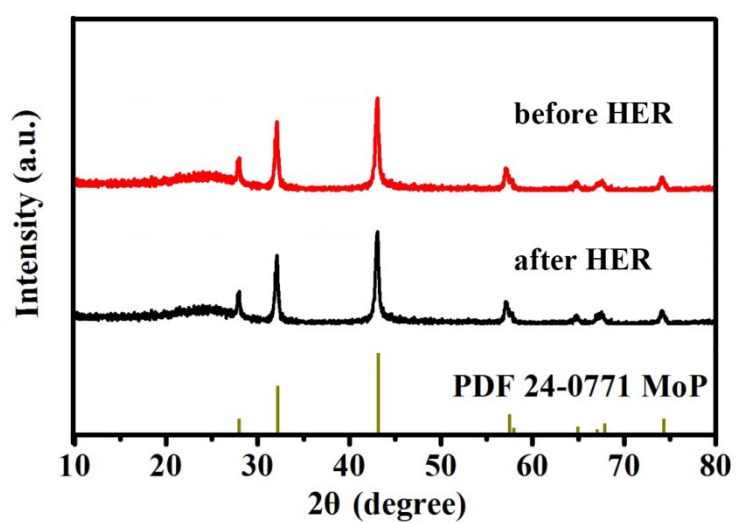

Fig. S11 XRD pattern of MoP-HS@CC before and after long-term stability test

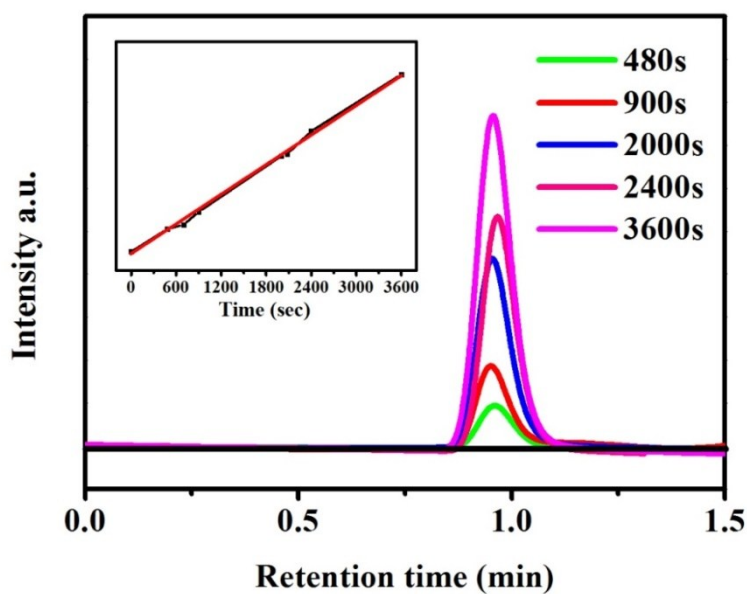

Fig. S12 The GC chromatograph of  $H_2$  gas production obtained with MoP-HS@CC under electrolysis at -0.2 V (vs. RHE) for 1h. The inset shows the volume of hydrogen and the testing time.



## Supplementary Movie

Movie S1 This movie shows the dynamic hydrogen production process at MoP@CC operated from +0.1 V to -0.3 V vs. RHE.

### References:

- 1 M. A. Lukowski, A. S. Daniel, F. Meng, A. Forticaux, L. Li and S. Jin, *J. Am. Chem. Soc.*, 2013, **135**, 10274-10277.
- 2 Y. H. Chang, C. T. Lin, T. Y. Chen, C. L. Hsu, Y. H. Lee, W. Zhang, K. H. Wei and L.J. Li, *Adv. Mater.*, 2013, **25**, 756-760.
- 3 P. Xiao, M. A. Sk, L. Thia, X. Ge, R. J. Lim, J. Y. Wang, K. H. Lima and X. Wang, *Energy Environ. Sci.*, 2014, **7**, 2624-2629.
- 4 X. Chen, D. Wang, Z. Wang, P. Zhou, Z. Wu and F. Jiang, *Chem. Commun.*, 2014, **50**, 11683-11685.
- 5 Z. Xing, Q. Liu, A. M. Asiri and X. Sun, *Adv. Mater.*, 2014, **26**, 5702-5707.
- 6 J. M. McEnaney, J. C. Crompton, J. F. Callejas, E. J. Popczun, A. J. Biacchi, N. S. Lewis and R. E. Schaak, *Chem. Mater.*, 2014, **26**, 4826-4831.
- 7 Z. Pu, Q. Liu, A. M. Asiri and X. Sun, *ACS Appl. Mater. Interfaces*, 2014, **6**, 21874-21879.
- 8 Z. Xing, Q. Liu, A. M. Asiri and X. Sun, *ACS Catal.*, 2015, **5**, 145-149.
- 9 Q. Liu, J. Tian, W. Cui, P. Jiang, N. Cheng, A. M. Asiri and X. Sun, *Angew. Chem. Int. Ed.*, 2014, **53**, 6710-6714.
- 10 H. Du, Q. Liu, N. Cheng, A. M. Asiri, X. Sun and C. M. Li, *J. Mater. Chem. A*, 2014, **2**, 14812-14816.
- 11 J. Tian, Q. Liu, A. M. Asiri and X. Sun, *J. Am. Chem. Soc.*, 2014, **136**, 7587-7590.
- 12 Z. Pu, Q. Liu, P. Jiang, A. M. Asiri, A. Y. Obaid and X. Sun, *Chem. Mater.*, 2014, **26**, 4326-4329.
- 13 R. Liu, S. Gu, H. Du and C. M. Li, *J. Mater. Chem. A*, 2014, **2**, 17263-17267.
- 14 P. Jiang, Q. Liu and X. Sun, *Nanoscale*, 2014, **6**, 13440-13445.
- 15 B. Qu, X. Yu, Y. Chen, C. Zhu, C. Li, Z. Yin and X. Zhang, *ACS Appl. Mater. Interfaces*, 2015, **7**, 14170-14175.
- 16 S. S. J. Aravind, K. Ramanujachary, A. Mugweru and T. D. Vadenet, *Applied Cat. A: General*, 2015, **490**, 101-107.
- 17 W. Cui, Q. Liu, Z. Xing, A. M. Asiri, K. A. Alamry and X. Sun, *Applied Catalysis B: Environmental*, 2015, **164**, 144-150.
- 18 Z. Xiaoxin, H. Xiaoxi, G. Anandarup, S. Rafael, B. R. Sathe and M. Eli?Ka, *Angew. Chem. Int. Ed.*, 2014, **53**, 4372-4376.
- 19 H. Vrubel and X. Hu, *Angew. Chem. Int. Ed.*, 2012, **51**, 12703-12706.
- 20 L. Feng, H. Vrubel, M. Bensimon and X. Hu, *Phys. Chem. Chem. Phys.*, 2014, **16**, 5917-5921.
- 21 Y. Liang, Q. Liu, A. M. Asiri, X. Sun and Y. Luo, *ACS Catal.*, 2014, **4**, 4065-4069.
